# Supplementary material
Source: PubMed Central journal article supplement (PMC547869)
Supplement: pnas_102_5_1614__2.pdf [file pnas_102_5_1614__2.pdf]

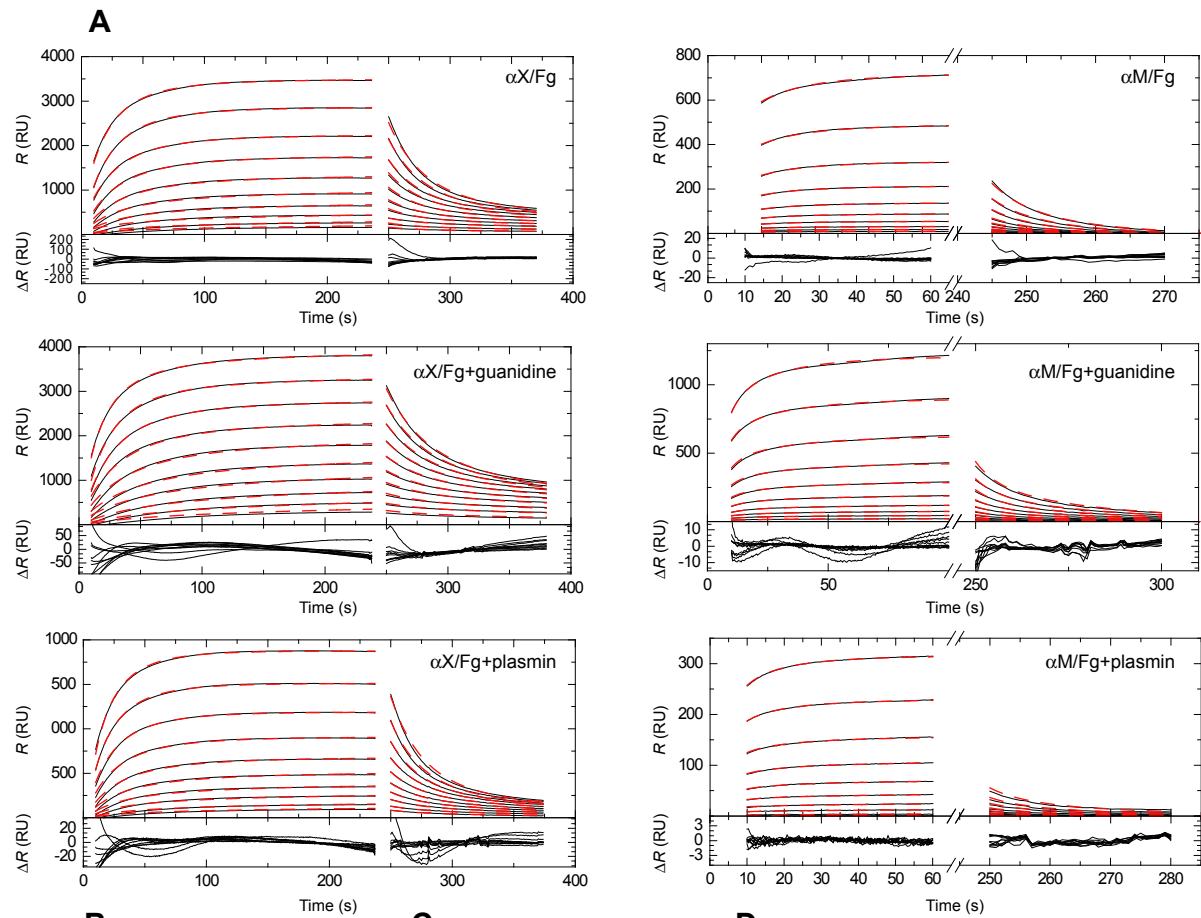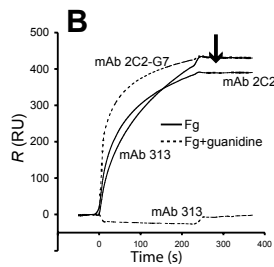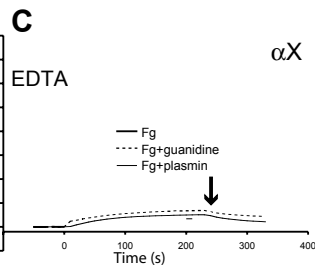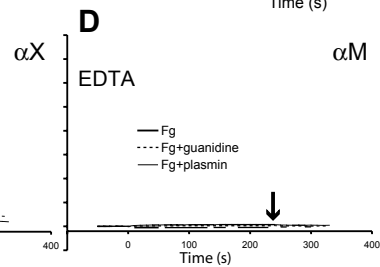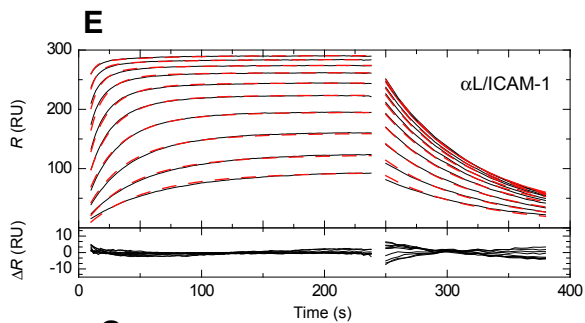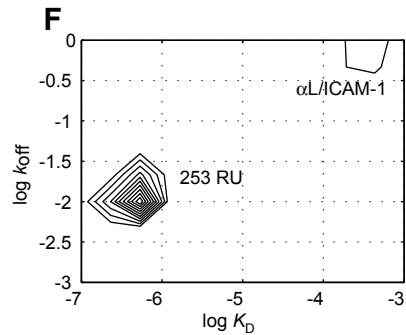

**G**

| I domain | Ligand | Ligand treatment |          |                  |          |                  |   |
|----------|--------|------------------|----------|------------------|----------|------------------|---|
|          |        | none             |          | guanidine        |          | plasmin          |   |
|          |        | $K_D$ ( $\mu$ M) | N        | $K_D$ ( $\mu$ M) | N        | $K_D$ ( $\mu$ M) | N |
| αX       | Fg     | 7.6±0.8          | 12.5±0.9 | 4.1±0.45         | 11.0±0.3 | 7.9±1.0          | - |
| αM       | Fg     | 45.8±13.7        | 7.4±0.9  | 39.0±6.1         | 12.5±1.5 | 70.1±4.2         | - |
| αX       | ICAM-1 | 28.1±6.5         | 9.7±1.5  | 11.6±7.18        | 9.7±3.08 | -                | - |
| αL       | ICAM-1 | 0.3±0.05         | 0.4±0.01 | 1.5±0.2          | 0.3±0.05 | -                | - |
