# Supplementary material
Source: PubMed Central journal article supplement (PMC547869)

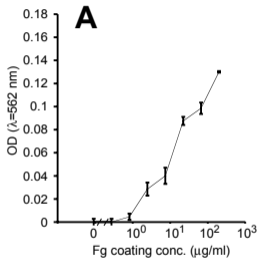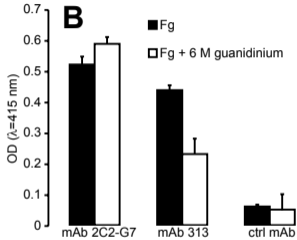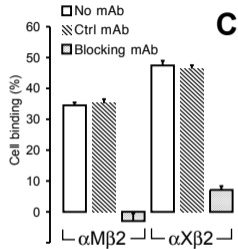

Supplement: pnas_102_5_1614__1.pdf [file pnas_102_5_1614__1.pdf]
